# Supplementary material for: Temperature effects on the C–H symmetric stretching vibrational frequencies of guest hydrocarbon molecules in 512, 51262 and 51264 cages of sI and sII clathrate hydrates
Source: Royal Society of Chemistry journal article supplement (doi:10.1039/d0ra06668k), 2020-01-01
Supplement: d0ra06668k1.pdf [file d0ra06668k1.pdf]

## Supporting Information

# **Temperature effects on the C–H symmetric stretching vibrational frequencies of guest hydrocarbon molecules in 5<sup>12</sup>, 5<sup>12</sup>6<sup>2</sup> and 5<sup>12</sup>6<sup>4</sup> cages of sI and sII clathrate hydrates**

Go Fuseya and Akihiro Hachikubo\*

*Kitami Institute of Technology, 165, Koen-cho, Kitami 090-8507, Japan*

Satoshi Takeya

*National Institute of Advanced Industrial Science and Technology (AIST),  
Central 5, 1-1-1, Higashi, Tsukuba 305-8565, Japan*

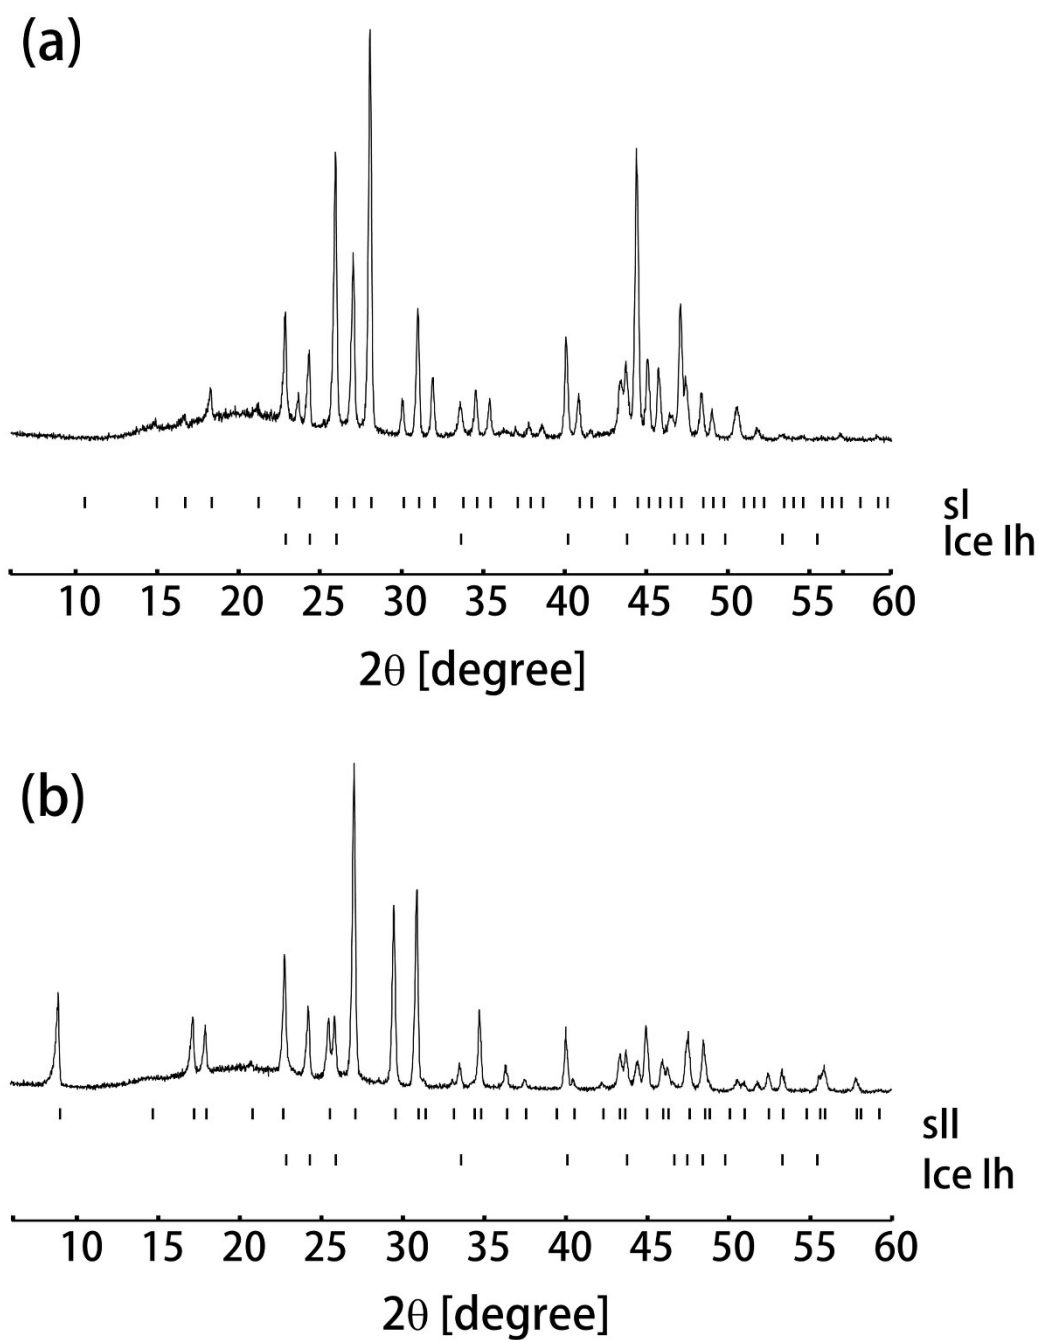

**Fig. S1.** X-ray diffraction patterns of the hydrate samples at 93 K: (a) sI  $C_2H_4$  hydrate and (b) sII Kr +  $C_2H_4$  hydrate. The curves in each pattern represent the observed intensities. The line marks below each pattern show the calculated peak positions for sI hydrate, sII hydrate and hexagonal ice.

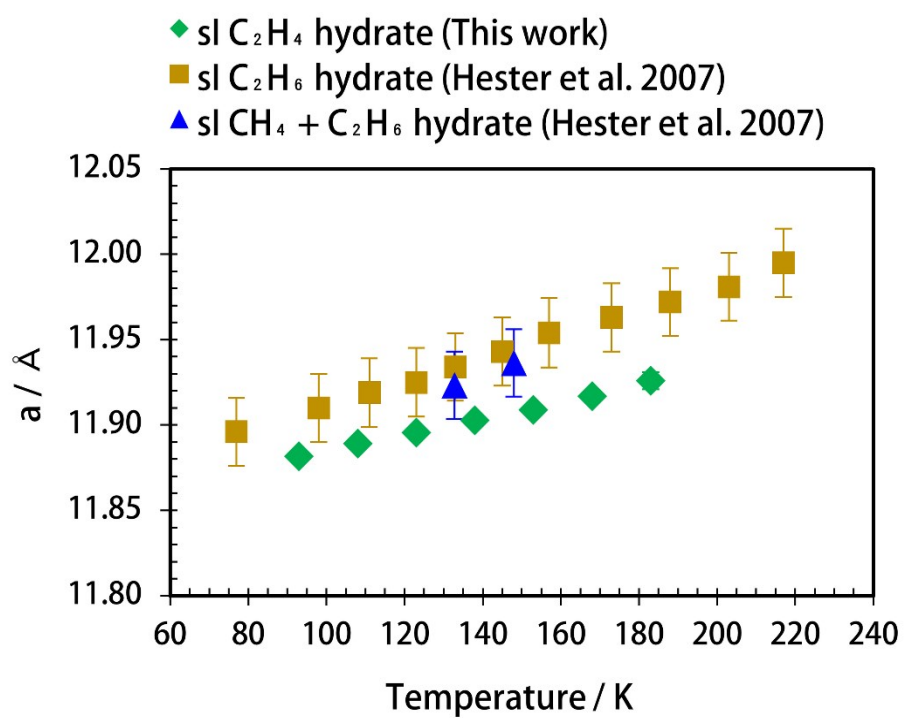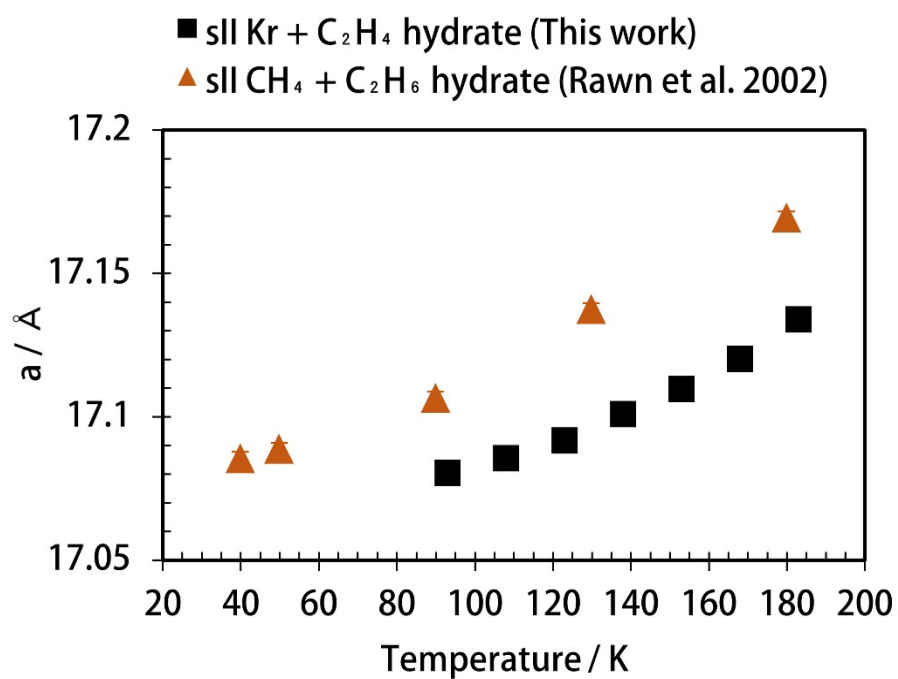

**Fig. S2.** Effect of temperature on unit-cell parameters of five types of sI and sII hydrates.<sup>1,2</sup>

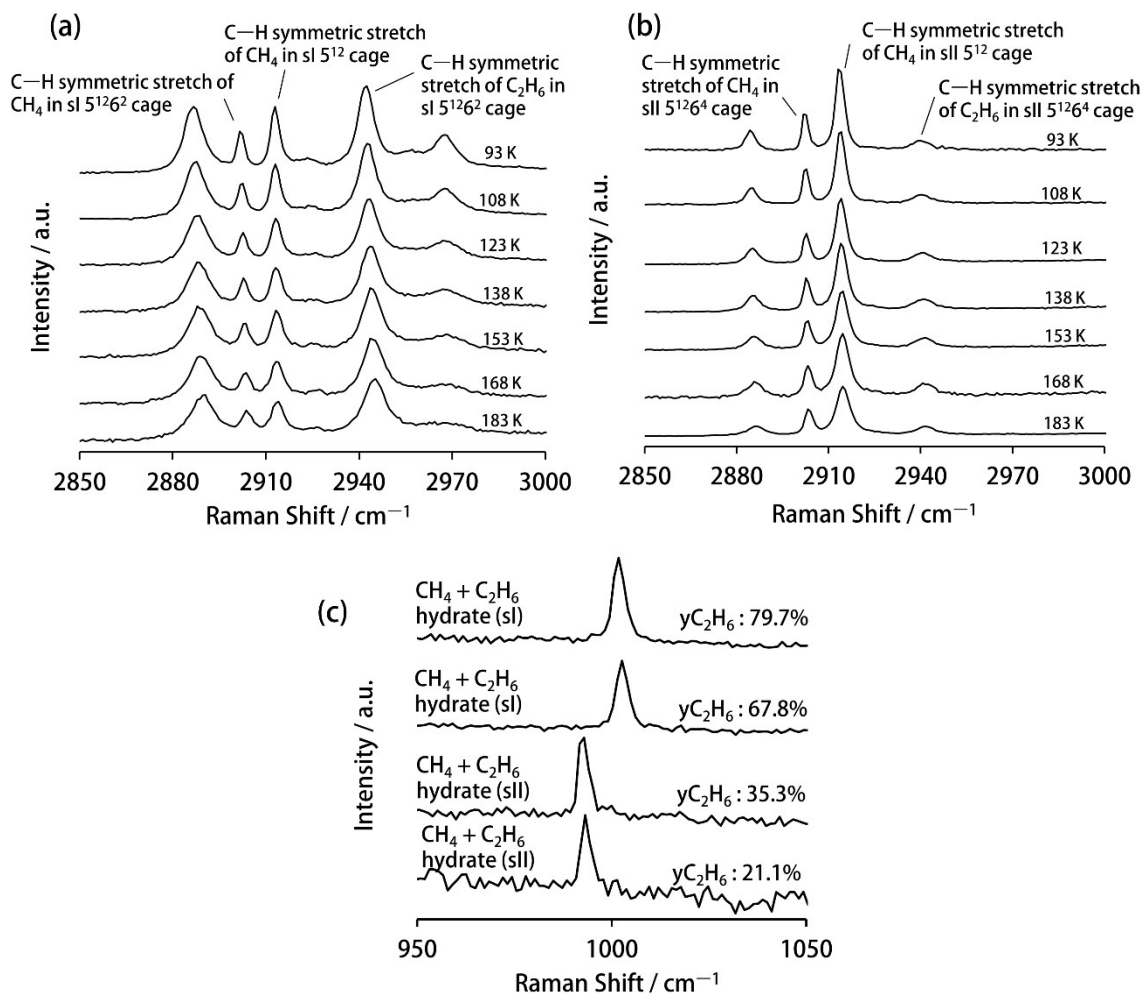

**Fig. S3.** Raman spectra of the C–H stretching region of (a) sI CH<sub>4</sub> + C<sub>2</sub>H<sub>6</sub> hydrates (yC<sub>2</sub>H<sub>6</sub> : 67.8%) and (b) sII CH<sub>4</sub> + C<sub>2</sub>H<sub>6</sub> hydrates (yC<sub>2</sub>H<sub>6</sub> : 21.1%) at a temperature range of 93–183 K. (c) Raman spectra of the C–C stretching region of encapsulated C<sub>2</sub>H<sub>6</sub> in sI and sII CH<sub>4</sub> + C<sub>2</sub>H<sub>6</sub> hydrates at 93 K.

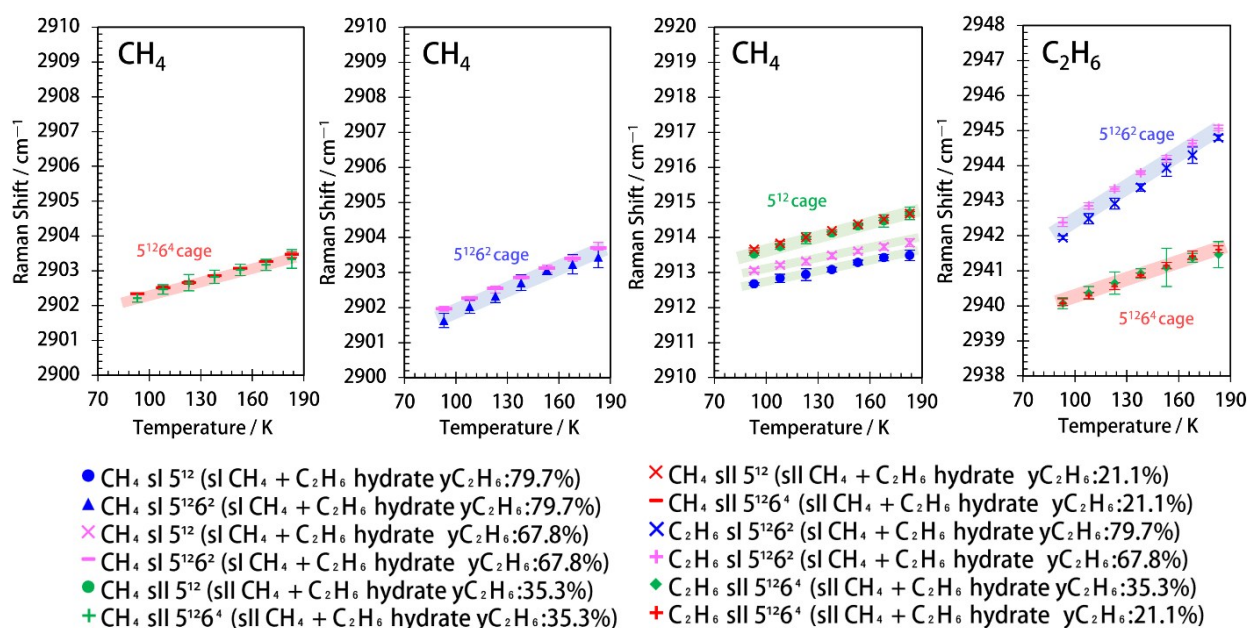

**Fig. S4.** Effect of temperature on Raman shifts of C–H symmetric stretch of encapsulated CH<sub>4</sub> and C<sub>2</sub>H<sub>6</sub> in sl and slI CH<sub>4</sub> + C<sub>2</sub>H<sub>6</sub> hydrates which have different guest composition.

**Table S1** Raman shifts of C–H symmetric stretch of CH<sub>4</sub> and C<sub>2</sub>H<sub>6</sub> in sI and sII CH<sub>4</sub> + C<sub>2</sub>H<sub>6</sub> hydrates which have different guest composition and their variations with temperature changes. The errors are the standard deviations of nine measurements at different sample positions.

| guest molecule                | cage                           | structure | bulk guest composition of C <sub>2</sub> H <sub>6</sub> [%] | estimated cage occupancy ratio of CH <sub>4</sub> in large cages <sup>3</sup> | estimated cage occupancy ratio of C <sub>2</sub> H <sub>6</sub> in large cages <sup>3</sup> | Raman shift at 93 K [cm <sup>-1</sup> ] | slope of Raman shift between 93 K and 183 K ( $\Delta\nu/\Delta T$ ) [10 <sup>-2</sup> cm <sup>-1</sup> /K] |
|-------------------------------|--------------------------------|-----------|-------------------------------------------------------------|-------------------------------------------------------------------------------|---------------------------------------------------------------------------------------------|-----------------------------------------|-------------------------------------------------------------------------------------------------------------|
| CH <sub>4</sub>               | 5 <sup>12</sup>                | sI        | 79.7                                                        | 0.04                                                                          | 0.94                                                                                        | 2912.7 ± 0.1                            | +0.9 ± 0.1                                                                                                  |
|                               | 5 <sup>12</sup> 6 <sup>2</sup> | sI        | 79.7                                                        | 0.04                                                                          | 0.94                                                                                        | 2901.6 ± 0.1                            | +2.0 ± 0.3                                                                                                  |
|                               | 5 <sup>12</sup>                | sI        | 67.8                                                        | 0.12                                                                          | 0.86                                                                                        | 2913.1 ± 0.1                            | +0.9 ± 0.1                                                                                                  |
|                               | 5 <sup>12</sup> 6 <sup>2</sup> | sI        | 67.8                                                        | 0.12                                                                          | 0.86                                                                                        | 2902.0 ± 0.1                            | +1.9 ± 0.1                                                                                                  |
|                               | 5 <sup>12</sup>                | sII       | 35.3                                                        | 0.14                                                                          | 0.83                                                                                        | 2913.5 ± 0.1                            | +1.3 ± 0.2                                                                                                  |
|                               | 5 <sup>12</sup> 6 <sup>4</sup> | sII       | 35.3                                                        | 0.14                                                                          | 0.83                                                                                        | 2902.2 ± 0.1                            | +1.2 ± 0.1                                                                                                  |
|                               | 5 <sup>12</sup>                | sII       | 21.1                                                        | 0.40                                                                          | 0.56                                                                                        | 2913.7 ± 0.1                            | +1.2 ± 0.1                                                                                                  |
|                               | 5 <sup>12</sup> 6 <sup>4</sup> | sII       | 21.1                                                        | 0.40                                                                          | 0.56                                                                                        | 2902.3 ± 0.1                            | +1.3 ± 0.1                                                                                                  |
| C <sub>2</sub> H <sub>6</sub> | 5 <sup>12</sup> 6 <sup>2</sup> | sI        | 79.7                                                        | 0.04                                                                          | 0.94                                                                                        | 2941.9 ± 0.1                            | +3.2 ± 0.1                                                                                                  |
|                               | 5 <sup>12</sup> 6 <sup>2</sup> | sI        | 67.8                                                        | 0.12                                                                          | 0.86                                                                                        | 2942.4 ± 0.1                            | +3.0 ± 0.1                                                                                                  |
|                               | 5 <sup>12</sup> 6 <sup>4</sup> | sII       | 35.3                                                        | 0.14                                                                          | 0.83                                                                                        | 2940.1 ± 0.1                            | +1.6 ± 0.1                                                                                                  |
|                               | 5 <sup>12</sup> 6 <sup>4</sup> | sII       | 21.1                                                        | 0.40                                                                          | 0.56                                                                                        | 2940.1 ± 0.1                            | +1.7 ± 0.1                                                                                                  |

## References

- [1] K. C. Hester, Z. Huo, A. L. Ballard, C. A. Koh, K. T. Miller and E. D. Sloan, *J. Phys. Chem. B*, 2007, **111**, 8830–8835.
- [2] C. J. Rawn, A. J. Rondinone, B. C. Chakoumakos, S. L. Marshall, L. A. Stern, S. Circone, S. Kirby, C. Y. Jones, B. H. Toby, and Y. Ishii, Neutron Powder Diffraction Studies as a Function of Temperature of sII Hydrate Formed from a Methane + Ethane Gas Mixture. Proceedings of the 4th International Conference on Gas Hydrates, Yokohama, Japan, 2002.
- [3] M. Kida, H. Sakagami, N. Takahashi, A. Hachikubo, H. Shoji, Y. Kamata, T. Ebinuma, H. Narita and S. Takeya, *J. Jpn. Petrol. Inst.*, 2007, **50**, 132–138.
